# Supplementary material for: LA Megacity: a High-Resolution Land-Atmosphere Modelling System for Urban CO 2 Emissions
Source: Copernicus journal article supplement (doi:10.5194/acp-2016-143), 2016-03-21
Supplement: Supplementary file 1 [file acp-2016-143-supplement.pdf]

1

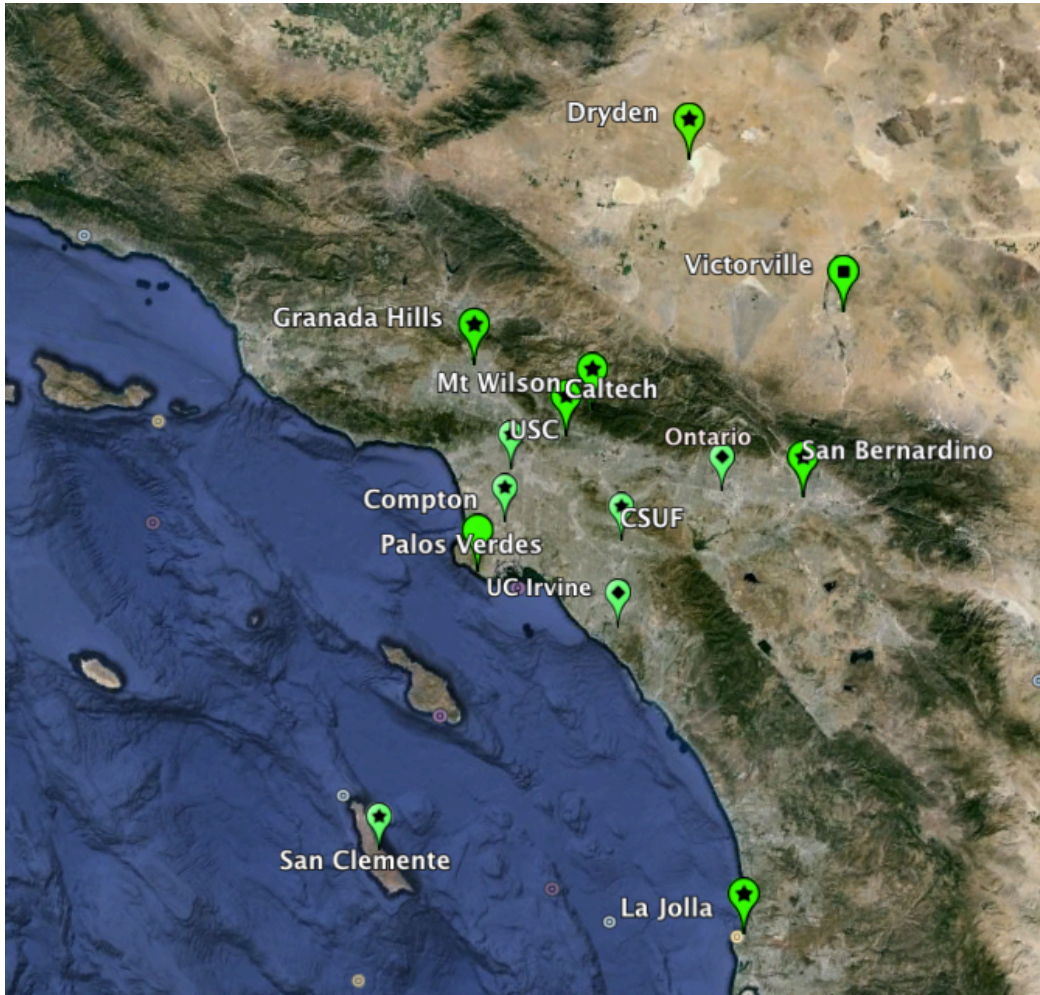

2

3 Figure S1. Google Earth map showing the location of the 14 GHG measurement sites, only 13 of  
4 which are within the innermost model domain except La Jolla site.

5
